# Supplementary material for: Using Electronic Reminders to Improve Human Papillomavirus (HPV) Vaccinations among Primary Care Patients
Source: MDPI journal article supplement (doi:10.3390/vaccines11040872), 2023-04-20
Supplement: s1 [file s1]

Supplementary Table S1. Baseline Characteristics of secondary analysis

| Baseline Characteristics | Electronic Reminder<br>(N=2,768)<br>N (%) | Usual Care<br>(N=3,703)<br>N (%) | P-value |
|--------------------------|-------------------------------------------|----------------------------------|---------|
| Age                      |                                           |                                  | <0.000  |
| 9-14                     | 930 (33.60)                               | 1,535 (41.45)                    |         |
| 15-18                    | 576 (20.81)                               | 693 (18.71)                      |         |
| 19-25                    | 1,262 (45.59)                             | 1,475 (39.83)                    |         |
| Sex                      |                                           |                                  | 0.357   |
| Male                     | 1,218 (44.00)                             | 1,672 (45.15)                    |         |
| Female                   | 1,550 (56.00)                             | 2,031 (54.85)                    |         |
| Vaccine Status           |                                           |                                  | 0.240   |
| Not initiated            | 1,943 (70.20)                             | 2,549 (68.84)                    |         |
| Initiated                | 825 (29.80)                               | 1,154 (31.16)                    |         |
| Race/Ethnicity           |                                           |                                  | 0.921   |
| Non-Hispanic White       | 693 (25.04)                               | 939 (25.36)                      |         |
| Non-Hispanic Black       | 706 (25.51)                               | 962 (25.98)                      |         |
| Hispanic                 | 671 (24.24)                               | 874 (23.60)                      |         |
| Other/Unknown            | 698 (25.22)                               | 928 (25.06)                      |         |
| Insurance                |                                           |                                  | 0.009   |
| Medicaid                 | 898 (32.44)                               | 1,337 (36.11)                    |         |
| Private (managed Care)   | 1,619 (58.49)                             | 2,049 (55.33)                    |         |
| Uninsured                | 221 (7.98)                                | 291 (7.86)                       |         |
| Other                    | 30 (1.08)                                 | 26 (0.70)                        |         |

Supplementary Table S2. Secondary analysis\* of HPV outcomes

| HPV outcomes                         | Electronic Reminder<br>(N=2,768) |                                   |         | Usual Care<br>(N=3,703) |
|--------------------------------------|----------------------------------|-----------------------------------|---------|-------------------------|
|                                      | N (%)                            | Adjusted Odds Ratio<br>(95% CI**) | P-Value | N (%)                   |
| Appointment Scheduling               | 563 (20.3)                       | 1.20<br>(1.06, 1.37)              | 0.005   | 700 (18.9)              |
| Clinic Visit                         | 403 (14.56)                      | 1.13<br>(0.98, 1.31)              | 0.088   | 520 (14.04)             |
| All additional HPV<br>Vaccination(s) | 333 (12.03)                      | 1.35<br>(1.14, 1.59)              | <0.001  | 402 (10.86)             |

\*Model controlled for age, sex, race/ethnicity, insurance and vaccine status

Supplementary Table S3. secondary analysis of subgroup vaccination outcomes

|                                | Electronic Reminder<br>(N=1,931) |                                   |         | Usual Care<br>(N=2,538) |
|--------------------------------|----------------------------------|-----------------------------------|---------|-------------------------|
|                                | N (%)                            | Adjusted Odds Ratio<br>(95% CI**) | P-Value | N (%)                   |
| HPV vaccine initiation rate    | 146 (7.56)                       | 1.32<br>(1.04, 1.68)              | 0.021   | 181 (7.13)              |
|                                | Electronic Reminder<br>(N=2,768) |                                   |         | Usual Care<br>(N=3,703) |
|                                | N (%)                            | Adjusted Odds Ratio<br>(95% CI**) | P-Value | N (%)                   |
| HPV vaccine completion<br>rate | 168 (6.07)                       | 1.32<br>(1.12, 1.56)              | 0.001   | 207 (5.59)              |
